# Supplementary material for: Transgenic expression of IL-7 regulates CAR-T cell metabolism and enhances in vivo persistence against tumor cells
Source: PubMed Central journal article supplement (PMC9307822; doi:10.1038/s41598-022-16616-2), 2022-07-22
Supplement: 41598_2022_16616_MOESM1_ESM.pdf [file 41598_2022_16616_MOESM1_ESM.pdf]

# Graph Abstract

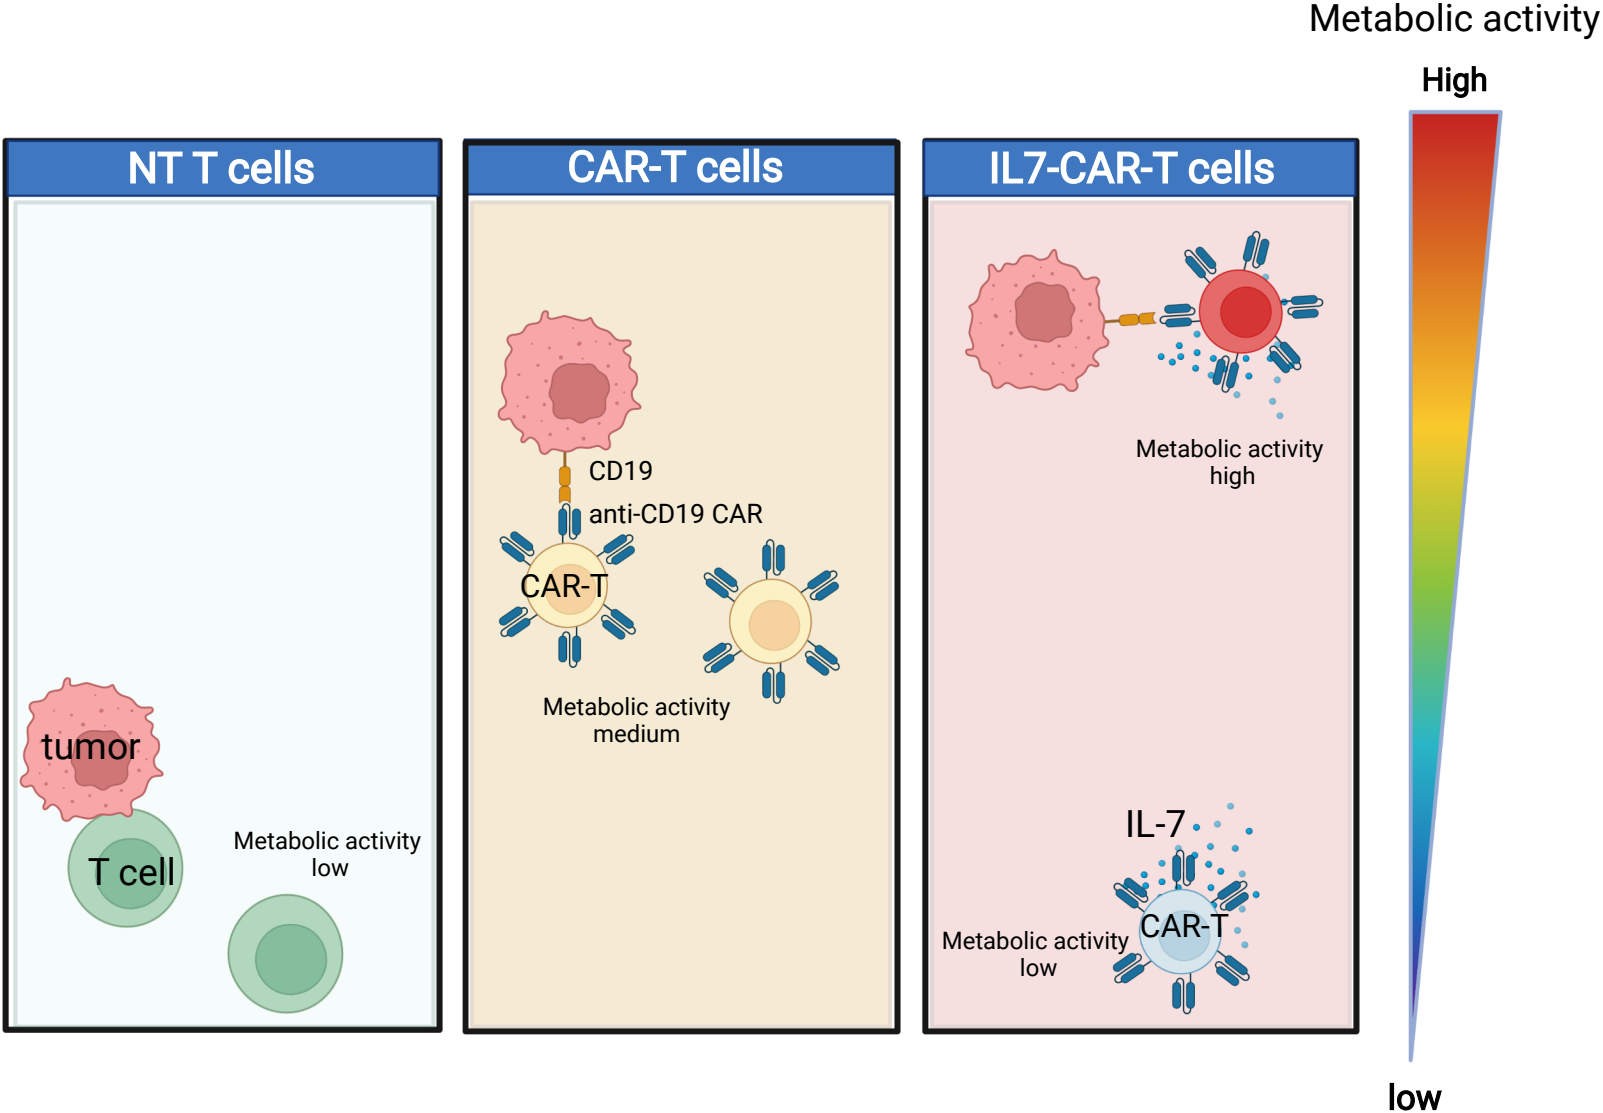

**Supplementary Table S1.** List of antibodies used for 35-parameter mass cytometry panel to characterize the T cells phenotype.

| <b>Tag</b> | <b>Antibody</b> | <b>Clone</b> | <b>Source</b>           |
|------------|-----------------|--------------|-------------------------|
| 113In      | CD8             | OKT8         | Thermo Fisher           |
| 115In      | CD3             | HIT3a        | Biolegend               |
| 127I       | IDU             | 32D8.D9      | Thermo Fisher           |
| 139La      | CD36            | 5-271        | Biolegend               |
| 141Pr      | CCR6            | G034E3       | Biolegend               |
| 144Nd      | CD26            | M-A261       | BD Biosciences          |
| 145Nd      | CD39            | A1           | Biolegend               |
| 148Nd      | CCR2            | K036C2       | Biolegend               |
| 149Sm      | CCR4            | L291H4       | Biolegend               |
| 150Nd      | CD28            | CD28.2       | Biolegend               |
| 151Eu      | Tbet            | 4B10         | Biolengend              |
| 152Sm      | TIGIT           | MBSA43       | Thermo Fisher           |
| 153Eu      | CD45RA          | HI100        | Biolengend              |
| 154Sm      | Granzyme A      | CB9          | Biolegend               |
| 155Gd      | CCR7            | G043H7       | Biolegend               |
| 156Gd      | TIM3            | F38-2E2      | Biolegend               |
| 158Gd      | 2B4             | 2-69         | Biolegend               |
| 159Tb      | FOXP3           | PCH101       | Fluidigm                |
| 160Gd      | CD19            | HIB19        | Biolegend               |
| 161Dy      | CXCR3           | G025H7       | Biolegend               |
| 162Dy      | Eomes           | WD1928       | Thermo Fisher           |
| 163Dy      | CD137           | QA18A49      | Biolegend               |
| 164Dy      | CTLA-4          | BNI3         | Biolegend               |
| 165Ho      | CD25            | 2A3          | BD Biosciences          |
| 166Er      | LAG3            | 11C3C65      | Biolegend               |
| 167Er      | Perforin        | B-D48        | Abcam                   |
| 168Er      | CD160           | BY55         | Biolegend               |
| 169Tm      | CD69            | FN50         | Biolegend               |
| 170Er      | CAR             | Polyclonal   | Jackson immune research |
| 171Yb      | CD4             | RM4-5        | Biolegend               |
| 172Yb      | KLRG1           | 13F12F2      | Thermo Fisher           |
| 173Yb      | PD1             | EH12.2H7     | Biolegend               |
| 174Yb      | TRAIL           | MD5-1        | Biolegend               |
| 176Yb      | KI67            | KI67         | Biolegend               |
| 194Pt      | CD57            | HCD57        | Biolegend               |

**Supplementary Table S2.** List of antibodies used for 32-parameter mass cytometry panel to characterize the T cells metabolic profile.

| <b>Tag</b> | <b>Antibody</b> | <b>Clone</b> | <b>Source</b>           |
|------------|-----------------|--------------|-------------------------|
| 113In      | CD8             | OKT8         | Thermo Fisher           |
| 115In      | CD3             | HIT3a        | Biolegend               |
| 127I       | IDU             | 32D8.D9      | Thermo Fisher           |
| 139La      | CD36            | 5-271        | Biolegend               |
| 141Pr      | GAPDH           | FF26A/F9     | Biolegend               |
| 142Nd      | CD98            | MEM-108      | Biolegend               |
| 144Nd      | GOT2            | PA5-35374    | Thermo Fisher           |
| 145Nd      | CD39            | A1           | Biolegend               |
| 146Nd      | IDH-1           | PA5-14358    | Thermo Fisher           |
| 148Nd      | CD4             | RM4-5        | Biolegend               |
| 149Sm      | Cytochrome C    | 37BA11       | Thermo Fisher           |
| 150Nd      | Granzyme K      | CB9          | BD Biosciences          |
| 152Sm      | MCT4            | 22787-1-AP   | Thermo Fisher           |
| 153Eu      | CD45RA          | HI100        | Biolengend              |
| 154Sm      | KI67            | KI67         | Biolegend               |
| 155Gd      | CCR7            | G043H7       | Biolegend               |
| 156Gd      | TIM3            | F38-2E2      | Biolegend               |
| 160Gd      | CD19            | HIB19        | Biolegend               |
| 161Dy      | CXCR3           | G025H7       | Biolegend               |
| 162Dy      | ASCT2           | D7C12        | Cell signaling          |
| 163Dy      | cmyc            | 9E10         | Thermo Fisher           |
| 164Dy      | CTLA-4          | BNI3         | Biolegend               |
| 166Er      | Glut-1          | SA0377       | Thermo Fisher           |
| 167Er      | OPA1            | JM81-35      | Thermo Fisher           |
| 168Er      | GLS             | PA5-35365    | Thomo Fisher            |
| 169Tm      | CD69            | FN50         | Biolegend               |
| 170Er      | CAR             | Polyclonal   | Jackson immune research |
| 171Yb      | Cpt1            | 15184-1-AP   | Thermo Fisher           |
| 172Yb      | PS6             | D57.2.2E     | Cell signaling          |
| 173Yb      | pNRF2           | EP1809Y      | ABCAM                   |
| 174Yb      | DRP1            | EPR19274     | ABCAM                   |
| 176Yb      | IRF4            | 3E4          | Thermo Fisher           |

# Supplemental figure 1

**A**

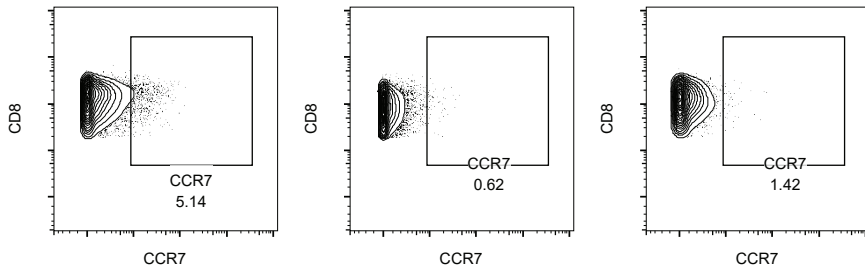

**B**

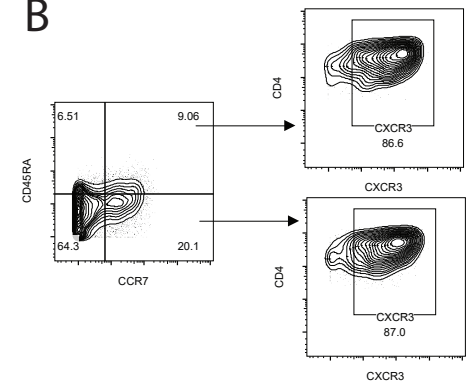

**C**

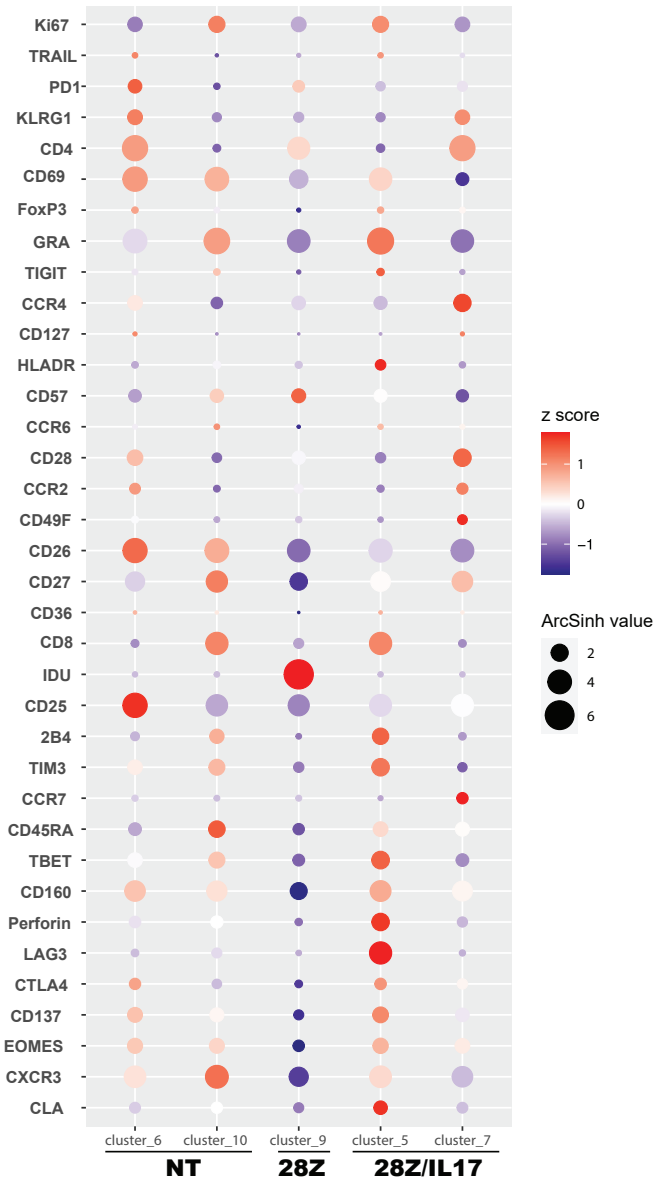

**D**

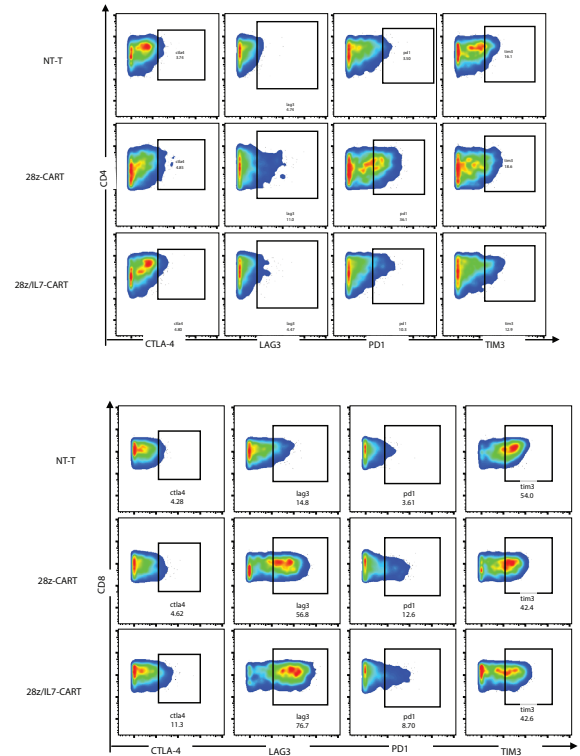

Supplemental figure 1. **IL-7 secreting CAR-T cells displayed less differentiation phenotype.** (A) FACS plots show the expression of CCR7 in CD8+ NT T cells, 28z-CAR T cells and 28z/IL7-CAR T cells. (B) FACS plots show the expression of CXCR3 in CD45+CCR7+ and CD45-CCR7+ population in CD4+ T cells. (C) Dot plot shows the expression of proteomic markers in cluster 6 and 10 of NT T cells, cluster 9 of 28z-CAR T cells and cluster 5 and 7 of 28z/IL7-CAR T cells. (D) FCS plots show the expression of CLT-4, LAG3, PD1 and TIM3 on CD4 (top) and CD8 (down) T cells

## Supplemental figure 2

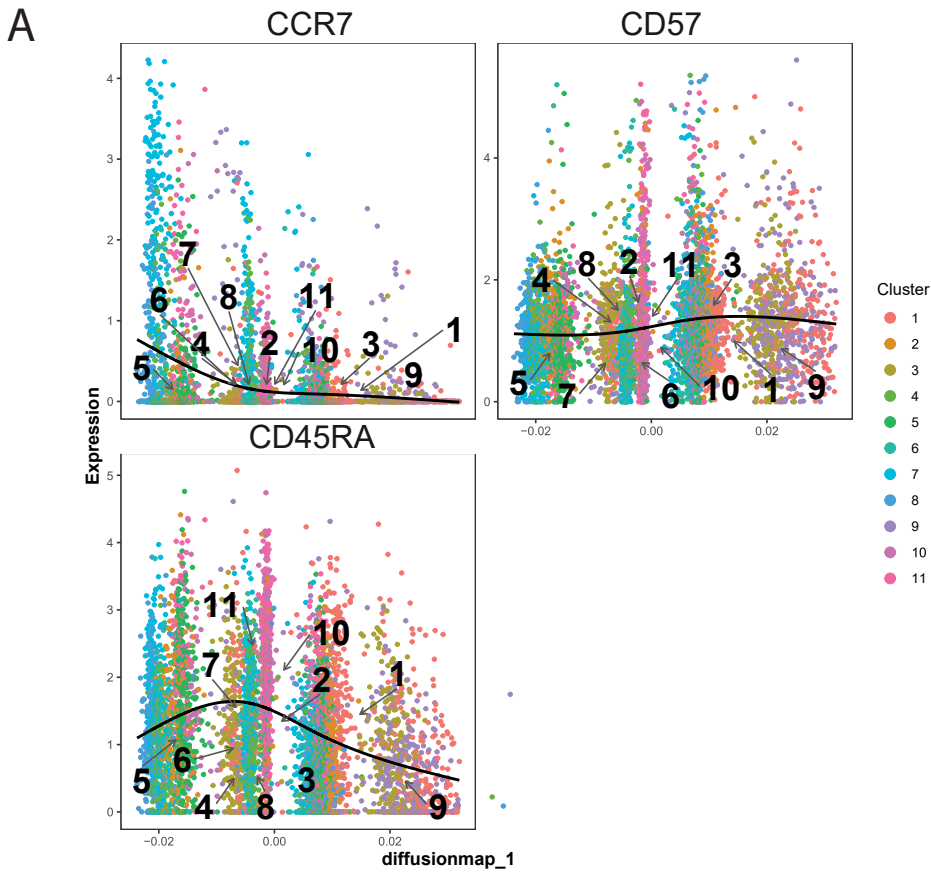

**B**

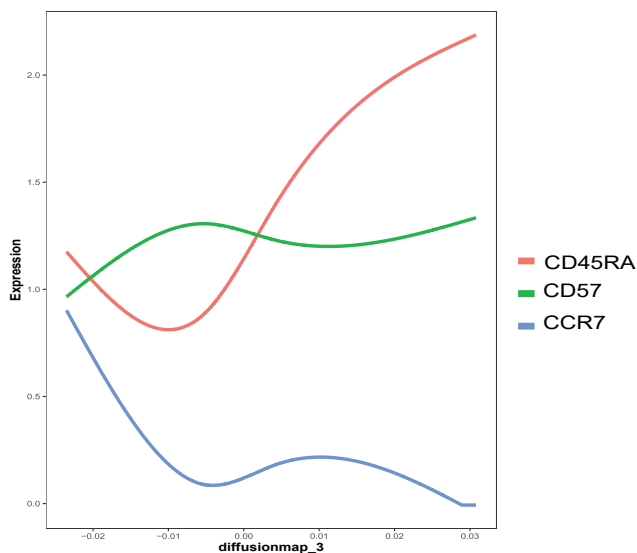

**C**

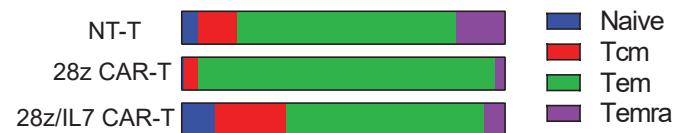

Supplemental figure 2. Trajectory analysis of CAR engineered T cells. **(A)** Diffusion map shows the expression of CCR7, CD57 and CD45RA in 11 clusters and the line shows the median of expression for each cluster. **(B)** Trend line shows the expression of CCR7, CD57 and CD45RA according to the diffusion map ranking. **(C)** Frequency of native, Tcm, Tem and Temra T cells in + NT T cells, 28z-CAR T cells and 28z/IL7-CAR T cells.

# Supplemental Figure 3

## CD4+ T cells

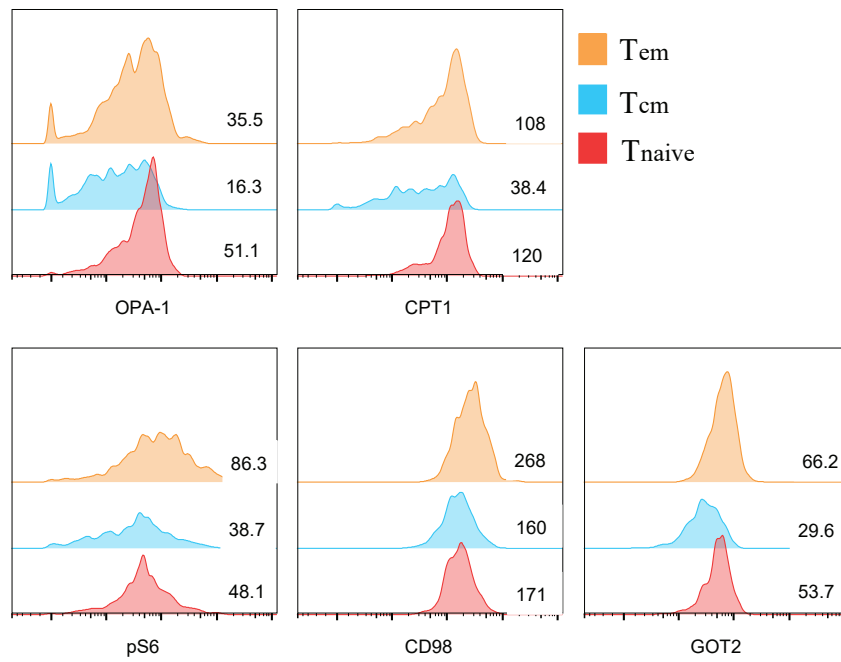

Supplemental figure 3. Histogram plots show the expression of OPA1, CPT1, pS6, CD98 and GOT2 of Tem, Tcm and Tnaive CD4+ T cells.

Supplementary Figure 4

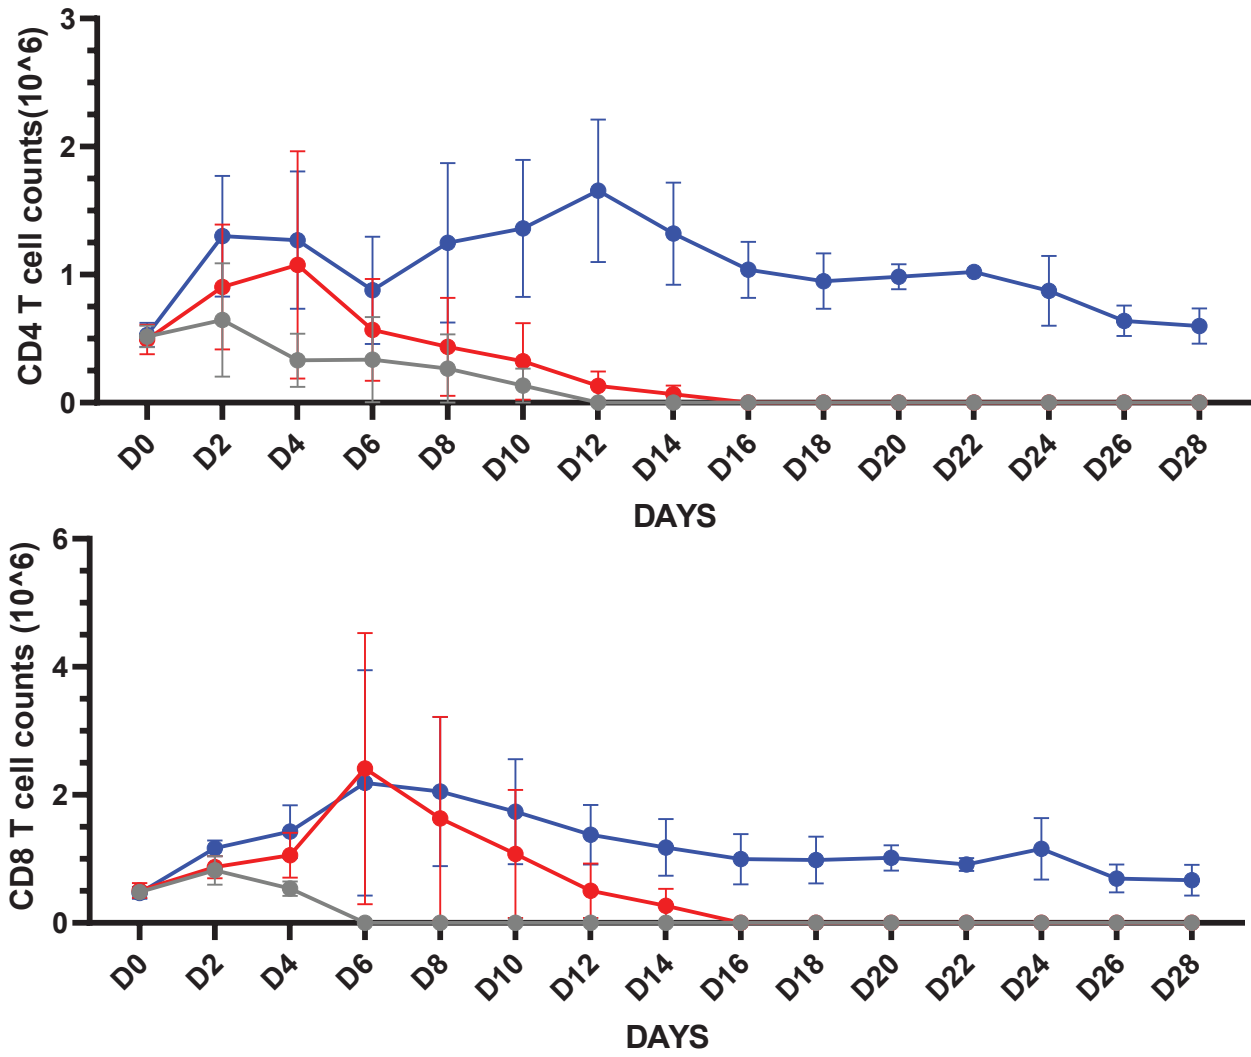

Supplementary Figure 4, Plots with lines show the CD4+ and CD8+ T cell number in different time points after T cells co-culture with Raji cells
